# Supplementary material for: Possible correlation between gut microbiota and immunity among healthy middle-aged and elderly people in southwest China
Source: Springer Nature journal article supplement (doi:10.1186/s13099-018-0231-3), 2018-02-09
Supplement: MOESM1 [file 15455268]

## Additional file 1

**Table S1. Serum indices and normal range**

| Indicators         | Middle-aged group | Elderly group  | Normal range     |
|--------------------|-------------------|----------------|------------------|
| Age(year)          | 54.13±3.32        | 64.70±3.93     | ---              |
| GLU(mmol/L)        | 6.19±1.45         | 5.89±0.90      | <6.1mmol/L       |
| HbA1c(%)           | 5.97±1.10         | 5.86±0.86      | <7.0%            |
| SSP (mmHg)         | 126.59±17.13      | 124.72±14.88   | ≤140mmHg         |
| DBP (mmHg)         | 76.11±11.14       | 75.88±10.32    | ≤90mmHg          |
| TC (mmol/L)        | 5.45±0.95         | 5.36±0.91      | 2.9-6.0mmol/L    |
| TG (mmol/L)        | 1.43±0.80         | 1.57±1.07      | 0.39-1.76mmol/L  |
| HDL (mmol/L)       | 1.47±0.53         | 1.40±0.42      | 1.29-1.55 mmol/L |
| LDL (mmol/L)       | 2.99±0.86         | 3.23±0.99      | <3.37mmol/L      |
| UA (μmol/L)        | 364.68±84.56      | 371.17±90.57   | 90-420umol/L     |
| BUN (mmol/L)       | 5.54±1.37         | 5.49±1.44      | 3.2-7.1mmol/L    |
| SCR (μmol/L)       | 101.58±25.94      | 113.16±30.63   | 44-133 μmol/L    |
| IgA (mg/mL)        | 2.38±0.99         | 2.59±0.97      | 76 -3.90 mg/mL   |
| IgG (mg/mL)        | 13.97±2.38        | 14.03±2.19     | 6 -16 mg/mL      |
| IgM (mg/mL)        | 1.25±0.45         | 1.16±0.49      | 0.40-3.45 mg/mL  |
| CD3+ T cell counts | 1257.50±453.29    | 1296.12±395.65 | ≥615             |
| CD4+ T cell % (%)  | 55.06±11.00       | 53.47±10.96    | ——               |
| CD8+ T cell % (%)  | 40.62±10.05       | 42.62±10.40    | ——               |
| CD4+/CD8+          | 1.53±0.75         | 1.38±0.58      | 1.4 ~2.0         |

Values presented as mean±SD, normal ranges cited from "Type 2 Diabetes Prevention Guide (2016 Edition, China)", "Guide of dyslipidemia prevention and treatment (2016 Edition)", "Hypertension Prevention Guide (2016 Edition)" and "Establishment of reference range of peripheral blood T cell subsets in healthy people", "Percentage of Chinese people's lymphatic range" etc.

GLU: glucose; SSP: systolic pressure; DBP: diastolic pressure; TC: total cholesterol;  
 TG: Triglyceride; HDL-C: High-density lipoprotein; LDL-C: Low-density lipoprotein;  
 UA: Uric acid; BUN: Blood urea nitrogen; SCR: serum creatinine.

**Figure S1. Composition of gut microbiota at the genus level**

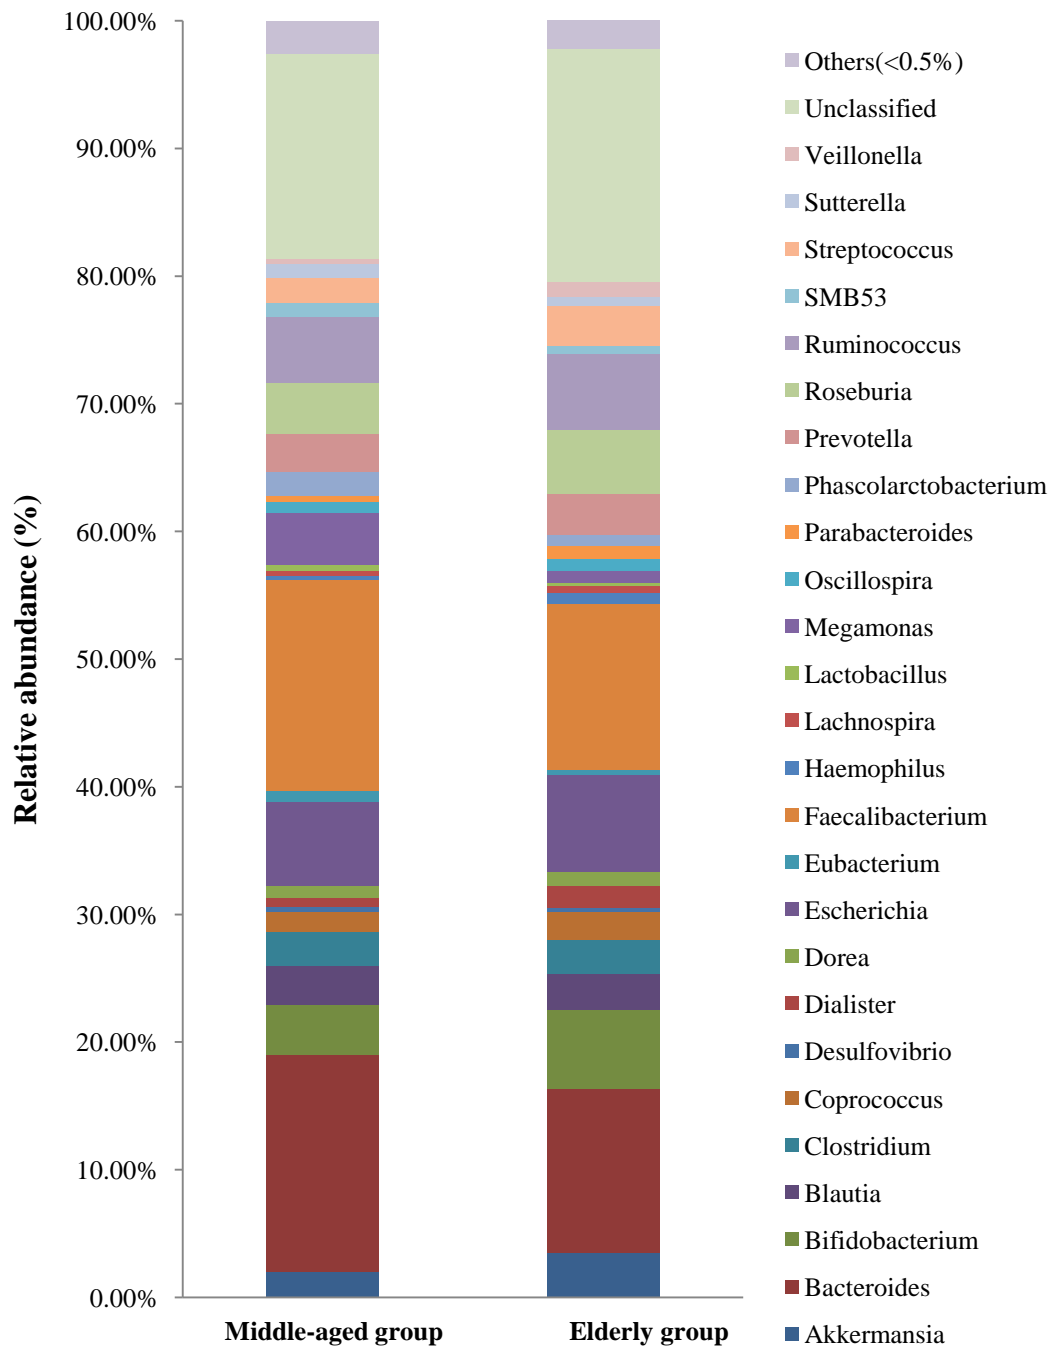

Genera with relative abundance greater than 0.5% are presented. Some unclassified genera are grouped as 'Unclassified'. The lower abundant genera are grouped as 'Others'.
